# Supplementary material for: Echolocating bats prefer a high risk-high gain foraging strategy to increase prey profitability
Source: eLife. 2023 Apr 18;12:e84190. doi: 10.7554/eLife.84190 (PMC10112884; doi:10.7554/eLife.84190)
Supplement: Supplementary file 1. [file elife-84190-supp1.xlsx]

## Sheet: 1a
Bat ID	Tag Type	GPS	Release site	Release Date	Recapture Date	Forearm length (mm)	CM3	Sex	Status	Bat weight (g)	Tag weight (g)	Tag:Body mass (%)	Recapture weight (g)	Duty cycle (%)
1	A	0	OC	2017-07-10	-	62.3	9.8	f	PL	28.6	3.5	12.2	-	100
2	A	0	DM	2018-07-14	2018-07-17	-	-	f	L/PL	30.1	3.7	12.3	27.3	100
3	A	0	DM	2018-07-14	2018-07-17	-	-	f	L/PL	31.2	4	12.8	29.5	100
4	A	0	DM	2018-07-22	2018-07-24	64	9.8	f	L/PL	29.8	3.8	12.8	27.1	100
5	A	0	DM	2018-07-22	2018-07-24	67	10	f	L/PL	30.5	4	13.1	28	100
6	A	0	DM	2018-07-22	2018-07-24	64	10	f	L/PL	30.1	3.5	11.6	27.1	100
7	A	0	DM	2018-07-22	2018-07-24	64	10	f	L/PL	29.4	3.6	12.2	25.1	100
8	B	0	OC	2018-07-22	2018-07-23	63.9	10	f	L	30.1	4.3	14.3	25.8	50
9	B	0	OC	2018-07-22	2018-07-23	63.7	10	f	L	30.6	4.6	15	27.3	50
10	B	0	OC	2018-07-22	2018-07-23	63.3	10	f	L	31.5	4.6	14.6	26.9	50
11	B	0	OC	2018-07-22	2018-07-23	65.9	10.1	f	L	30.2	4.5	14.9	26.2	50
12	B	0	OC	2018-07-22	2018-07-23	65.4	9.8	f	L	31	4.6	14.8	27.3	50
13	A	0	DM	2018-08-04	-	66.1	10	f	PL	29.3	4	13.7	-	100
14	B	0	DM	2018-08-04	2018-08-07	63.5	9.9	f	PL	30.2	4.6	15.2	28.8	100
15	B	0	DM	2018-08-04	2018-08-07	66.2	10.5	f	PL	28.4	4.6	16.2	-	100
16	B	0	DM	2018-08-11	2018-08-16	65.5	10.2	f	PL	29.8	4.6	15.4	27.7	100
17	A	0	DM	2018-08-11	2018-08-13	64	10	f	PL	28.7	4	13.9	-	100
18	B	0	DM	2018-08-11	2018-08-19	61.2	10.2	f	PL	29.2	4.5	15.4	27.6	100
19	A	0	OC	2019-07-10	2019-07-12	64.3	10	f	PL	29	3.5	#DIV/0!	27.4	100
20	A	0	OC	2019-07-10	2019-07-12	62.3	10	f	PL	29.3	3.5	11.9	26.9	100
21	A	0	OC	2019-07-10	-	66.9	10	f	PL	29.4	3.5	11.9	-	100
22	B	1	OC	2019-07-11	-	64.5	9.9	f	L/PL	29.9	4.4	14.7	-	100
23	B	1	OC	2019-07-11	2019-07-18	65.3	10	f	L/PL	30.6	4.5	14.7	-	100
24	A	0	DM	2019-07-18	2019-07-20	63.4	9.9	f	PL	27.9	3.5	12.5	29.4	100
25	A	0	DM	2019-07-18	2019-07-20	63.4	10	f	PL	28	3.5	12.5	27.1	100
26	B	1	DM	2019-07-18	2019-07-20	65.3	10.2	f	L/PL	29.3	4.5	15.4	27.9	100
28	A	0	DM	2019-07-18	-	64.1	10.1	f	PL	28.1	3.5	12.5	-	100
28	B	1	DM	2019-07-18	-	64.5	10.1	f	L/PL	30.4	4.5	14.8	-	100
29	B	1	Tabachka	2019-07-19	2019-07-20	63.5	10.2	f	L/PL	29.4	4.5	15.3	27.8	100
39	A	0	DM	2019-07-22	-	-	-	f	PL	28.9	3.8	13.1	-	100
31	B	1	DM	2019-07-22	2019-07-25	65.6	10.1	f	L/PL	30.1	4.4	14.6	28.2	100
32	B	0	DM	2019-07-22	2019-07-24	63	9.7	f	L/PL	29.8	4.3	14.4	28.1	100
33	B	1	DM	2019-07-22	2019-07-25	64.9	9.8	f	L/PL	29.5	4.4	14.9	28.1	100
34	B	0	DM	2019-07-22	2019-07-25	63.6	10.1	f	L/PL	29.7	4.4	14.8	28.4	100

## Sheet: 1b
Strategy	Aerial			Ground
	Tag		No Tag	Bowl	Natural
(N = 2-3 bats)	Moths	Mealworms		Small & large beetles
Trials	116	81	89	56	67
Success rates	0.69	0.95	0.75	0.85	0.39

## Sheet: 1c
Model 1a	Prey attacks ~ Strategy + TagPercentWeight + ( 1 | AnimalNo)
Distribution	Gaussian (link: identity)
	Fixed effects
Parameters	Est	Std. Error	p-value
Intercept	92.2	70.4	0.195
Strategy	-44.8	13.2	0.001
TagPercentWeight	-0.8	5	0.87
	Goodness of fit
R(m)2	0.15
R(c)2	0.15

## Sheet: 1d
Model 1b	Success ratio ~ Strategy + TagPercentWeight + ( 1 | AnimalNo)
Distribution	Gaussian (link:identiy)
	Fixed effects
Parameters	Est	Std. Error	p-values
Intercept	29.2	19. 9	0.15
Strategy	45.8	3.4	<0.000001
TagPercentWeight	0.09	1.4	0.9
	Goodness of fit
R(m)2	0.74
R(c)2	0.77

## Sheet: 1e
Model 2a	Prey attacks ~ Habitat + Strategy + Style + ( 1 | AnimalNo)
Distribution	Poisson (log-link)
	Fixed effects
Parameters	Est	Std. Error	p-value
Intercept	2.02	0.35	<0.00001
Habitat1	-0.87	0.1	<0.00001
Strategy1	-1.07	0.12	<0.00001
Style1	1.03	0.14	<0.00001
	Goodness of fit
R(m)2	0.42
R(c)2	0.94

## Sheet: 1f
Model 2b	Success Ratio ~ Habitat + Strategy + Style + ( 1 | AnimalNo)
Distribution	Gaussian
	Fixed effects
Parameters	Est	Std. Error	p-values
Intercept	0.325	11	0.05
Habitat1	-0.149	8.8	0.09
Strategy1	0.514	9.9	<0.00001
Style1	-0.062	9.6	0.52
	Goodness of fit
R(m)2	0.45
R(c)2	0.54

## Sheet: 1g
Model 3	Strategy Ratio ~ Release Date + (1|Release Site)
Distribution	Gaussian
	Fixed effects
Parameters	Est	Std. Error	p-value
Intercept	83.4	9.07	<0.0001
Release Date2	-3.1	11.1	0.777
Release Date3	-73.3	9.3	<0.0001
Release Date4	12.2	10.6	0.26
Release Date5	16.1	10.6	0.1
Release Date6	15.1	10.1	0.14
Release Date7	13.1	10.6	0.2
Release Date8	5.2	10.1	0.6
Release Date9	-23.2	12.7	0.08
Release Date10	-29.6	10.1	0.007
	Goodness of fit
R(m)2	0.94
R(c)2	0.95

## Sheet: 1h
A	Listening
Detector		+	-
	Y	271	3
	N	27	86
G	Listening
Detector		+	-
	Y	132	2
	N	4	314

## Sheet: 1i
	Gleaning	Hawking
PPV	0.99	0.99
FNR	0.03	0.09
